# Supplementary material for: Achieving pattern uniformity in plasmonic lithography by spatial frequency selection
Source: publisher site journal article supplement (doi:10.1515/nanoph-2017-0028), 2017-10-17
Supplement: Supplementary file 1 [file nanoph-2017-0028_suppl.docx]

Gaofeng Liang, Xi Chen, Qing Zhao,* and L. Jay Guo[[1]](#footnote-1)

Supplementary material

Achieving pattern uniformity in plasmonic lithography by spatial frequency selection

S1 Comparison of the rough surfaces in measurement and simulation


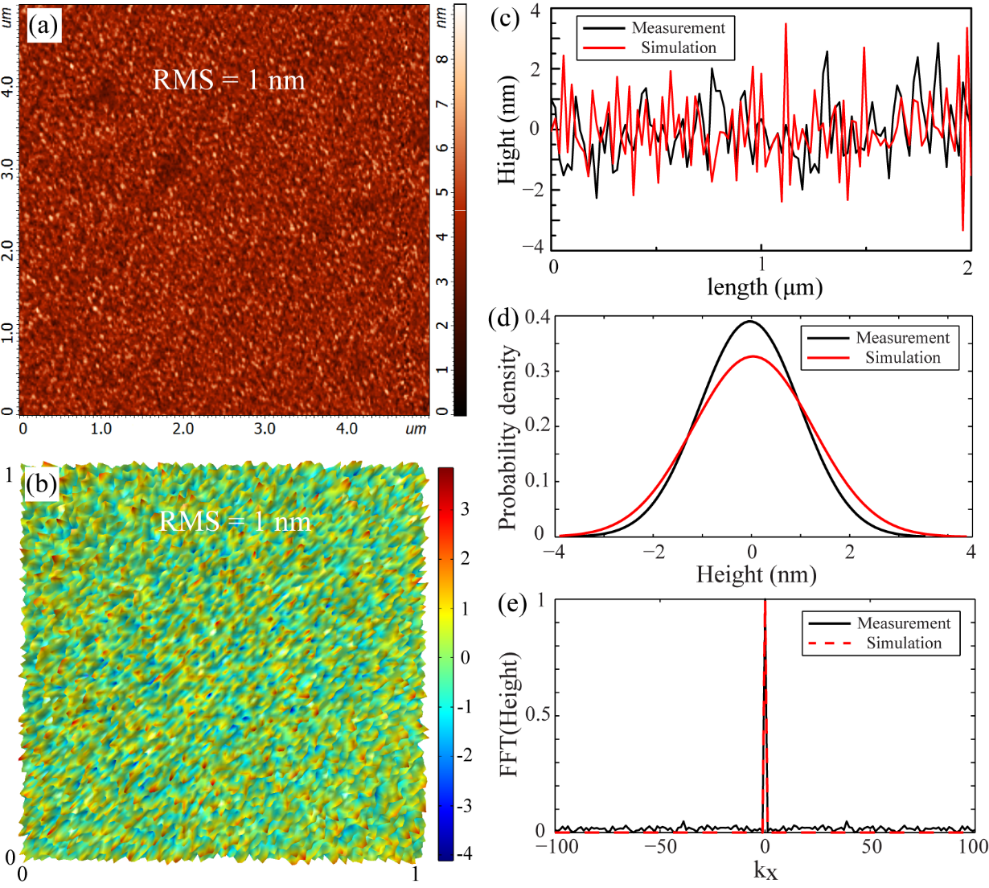


**Figure S1**. Images of the rough surfaces from (a) AFM measurement and (b) COMSOL simulation. (c) Two curves are extracted from (a, b) respectively. (d, e) Distributions of height and spatial frequency spectrum of curves in (c).

The root-mean-square (RMS) roughness *i.e.*  used in the main text is determined *via* topography values of the rough films with a quantitative and statistic surface analysis. For a rough surface in the - plane, the roughness can be calculated by the following equation:

(S1)

where is the height of the point at position; is the average height of the entire rough surface; and are the total number of the topography points along and directions, respcetively. Figure S1 gives a comparison of rough surfaces with RMS = 1 nm generated from simulation and measurement, respectively. The image in Figure S1a is a surface topography of area (256×256 pixels) scanned by atomic force microscope (AFM) from a silver (Ag) film with the thickness of 20 nm. The rough surface in Figure S1b is generated by a numerical software (COMSOL Multiphysics© 4.4) with random functions, where the standard deviation (SD) of the height is set to be 1 nm, and the average height is set to be 0 nm. Because the SD of a rough surface in the simulation is defined as

(S2)

meaning the value of SD in simulation is equal to the RMS roughness. Two curves with length of 2 in Figure S1c, extracted randomly from the measurement and simulation images separately, show similar zero-mean Gaussian contour and spatial frequency spectrum distribution (Figure S1d-e). These comparisons illustrate that the two images have proximate surface properties, which confirm the software is feasible to simulate rough surfaces.

The number of mesh elements in simulation is related to the parameter of knots, which are connected together to form a rough surface distribution. Here, the spacing between the two adjacent knots is set to 6 nm. It is possible to create finer meshes with higher density in the areas of interest. However, the increase of the mesh density does not change the result significantly while the computing time raises dramatically.

S2 Design process of the proposed HMM structure


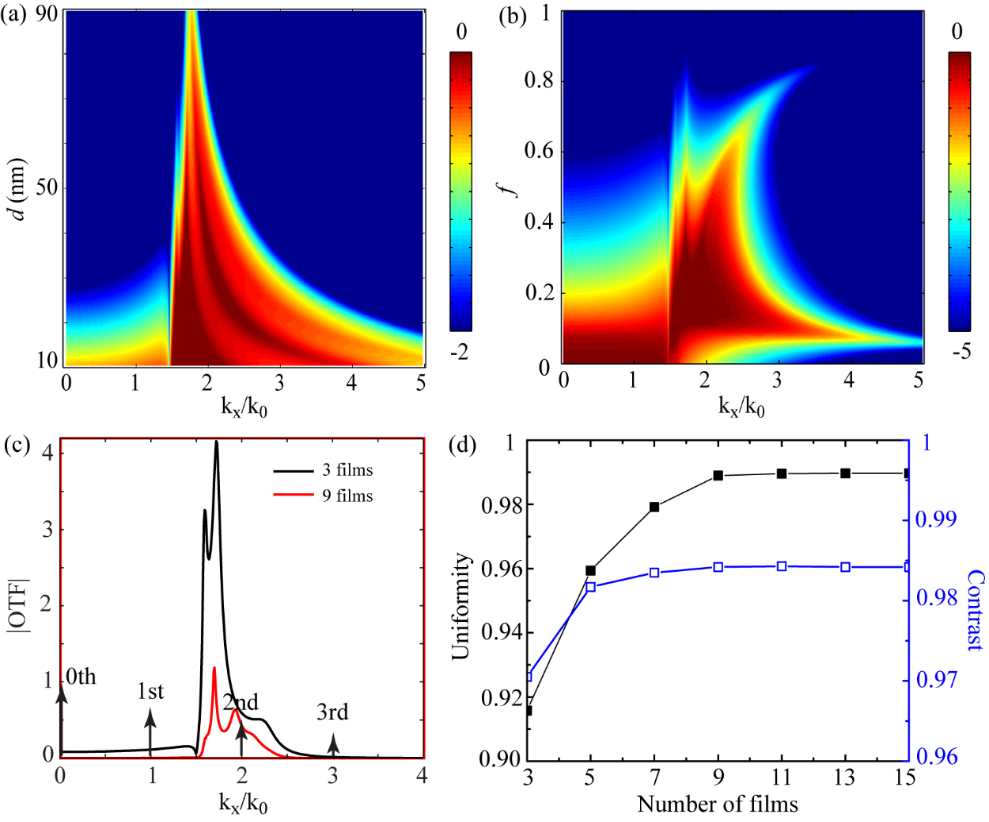


**Figure S2**. OTF plots in logarithm scale as function of (a) the thickness of a periodic unit and (b) the metal film filling factor  in the Al/SiO2 multilayers. (c) OTF curves of the 3 films (black curve) and 9 films (red curve) multilayer. Black arrows mark the positions of the diffraction orders of the mask in *k*-space. (d) Uniformity (solid square/black data) and contrast (blank square/blue data) of the interference patterns in the PR *vs.* the number of the alternating films.

Many parameters of the multilayer including filling ratio of the metal, thickness of a unit, and number of films affect the performance of the hyperbolic metamaterial (HMM) lithography system. To understand these variables, optical transfer function (OTF) as well as uniformity and contrast of the patterns in the photoresist (PR) are estimated to achieve the optimized design. Figure S2a-b shows that the OTF passband of the HMM can be tuned by changing the unit thickness and the filling factor of metal in the Al/SiO2 multilayers, respectively. The thickness of a periodic unit is and the metal filling factor is calculated by , where is the thickness of a metal layer and is the thickness of a dielectric layer. As and increase, the passband in -space becomes narrower, which is beneficial as a filter to block the unwanted diffraction orders. However, the transmission drops down simultaneously due to the accumulated inherent loss of the metal films. Thus, there is a tradeoff considering and in the design of the HMM structure. As elaborated in reference [7], uniformity and contrastof the interference patterns are mainly determined by the number of the alternating films. When the desired diffraction orders are transmitted layer by layer, uniformity and contrast of the pattern in the PR are improved accordingly. As compared in Figure S2c-d, HMM with 3 films is able to generate interference patterns; however, with purified diffraction waves, 9 films deliver patterns with higher uniformity and contrast. Therefore, adequate films are necessary in the HMM system. The uniformity in Figure S2d is calculated by , where is the mean peak intensity of the interference patterns in the intensity distribution; is the maximum difference among the peaks. The contrast of the pattern is defined as , where is the mean valley intensity of the interference patterns.

S3 OTF curves with the reflective layers

The OTF curve shown in the main text only considers the single Ag film in the superlens system, similarly, only the multilayer structure in the HMM system. In the real lithography cases, the reflective layer and the finite thickness of the PR also affect the light distribution in the near field, especially at the resonance. If the PR and reflective Ag layers are involved in the superlens system, the OTF curve abstracted from the middle of PR film is given in Figure S3a. It presents a broad passband, though the amplitude of the high- region drops down quickly. The low transmission amplitude in the high- range explains the wavevector distribution shown in Figure 3h of the main text, where the spatial frequency spectrum is transformed from the field in the middle of PR film. The refletive layer helps to form the optical cavity and enhance the field intensity in the PR film. Therefore, the amplitude of the 2nd order diffraction wave is much smaller than those of the 1st order and the 0th order.


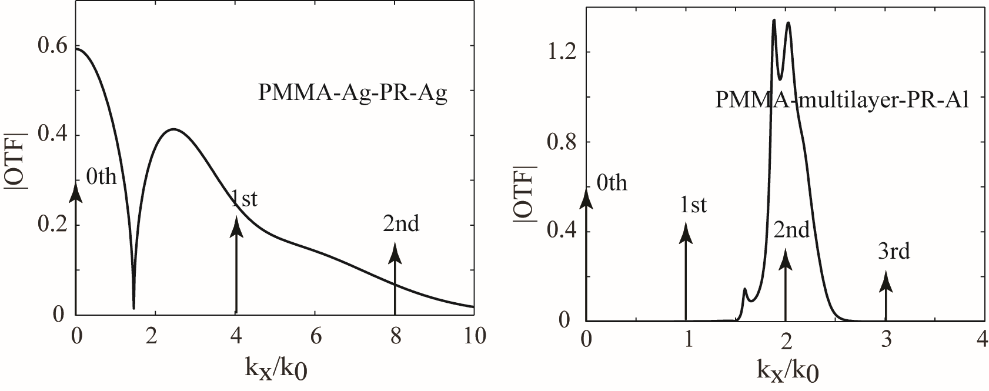


**Figure** **S3**. OTF curves calculated for (a) the superlens system and (b) the HMM system with PR and reflective layers involved. Arrows give the -space positions of wave orders diffracted from the masks in respective lithography systems.

If the PR and reflective Al layers are considered in the HMM lithography system, the OTF curve presents narrower passband (Figure S3b) compared with that shown in Figure 3a. While, the peak of the passband still coincides with the spatial frequency spectrum of the 2nd order diffraction of the grating. Additionally, the narrower bandwidth shows better filtering effects, which further illustrates the reflective layer can enhanced the performance of plasmonic lithography.

S4 Fourier transform of 2D field distribution

According to the Fourier transform theory, the electromagnetic field in the - space can be transformed to the wave vector - space.

(S3)

where is the field component at (*x*, *y*) position; and are the maximum positions in and direction, respcetively; and are horizontal and vertical coordinates in Fourier space, respectively. If we define , equation S3 can be transfered to:

(S4)

In the main text, the distributions of the spatial frequency spectrum shown in Figure 2g-i and Figure 3g-i are transformed using equation S4, where is the magnetic field component in the real space.

S5 The resonant peaks in the OTF of the HMM


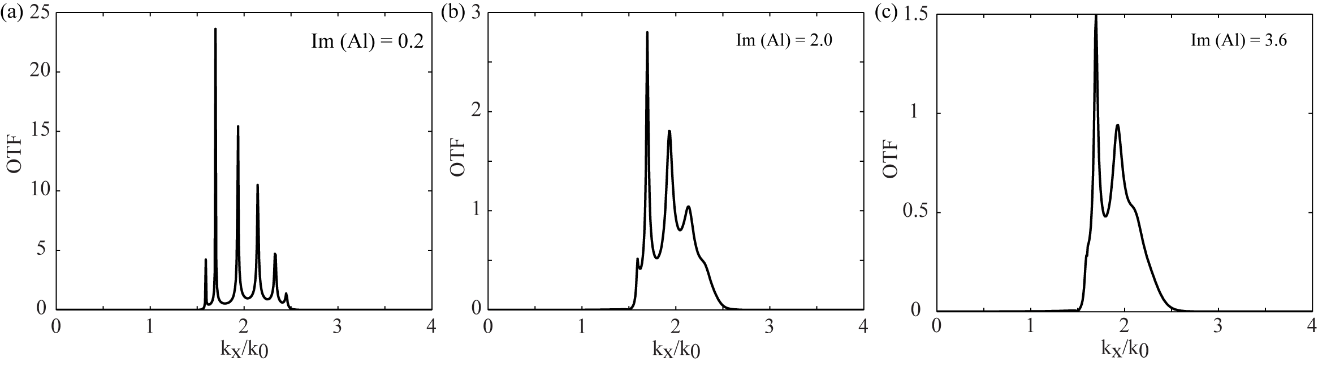


**Figure S4**. (a, b, c) OTFs for 9 films multilayer with variant imaginary permittivity of Al at the wavelength of 365 nm.

To illustrate the behavior of the HMM, the light propagation inside HMM can be treated as the coupling of the surface plason (SP) waves generated at each metal/dieletric interface. The HMM presents diverse characteristics at different working wavelengths. The multilayer composed of 9 aluminum (Al) (15 nm)/ silicon dioxide (SiO2) (30 nm) films is a type Ⅱ HMM at the wavelength of 365 nm [1-3]. Considering the surrounding dielectric materials, the multilayer emerges 6 peaks in the OTF curve (TM0 to TM5 modes) [4-5]. The loss of metal films results in damped resonances, and hence much less resonant peaks present in the OTF curve. It is demonstrated in Figure S4a-c with varied imaginary parts of Al permittivity (0.2, 2.0, and 3.6, respectively) and fixed real part (-19.42). For the Al films with a small imaginary value 0.2, all the six modes exist in the OTF curve. As the imaginary value increases, some resonant peaks merge and disappear. There are only two distinguishable peaks when imaginary value is 3.6. However, the overall envelope and the transmission bandwidth of the systems with different loss do not change appreciably. Similar results could be seen in other works [6-7].

S6 OTF curves of superlens and HMM with different surface roughness


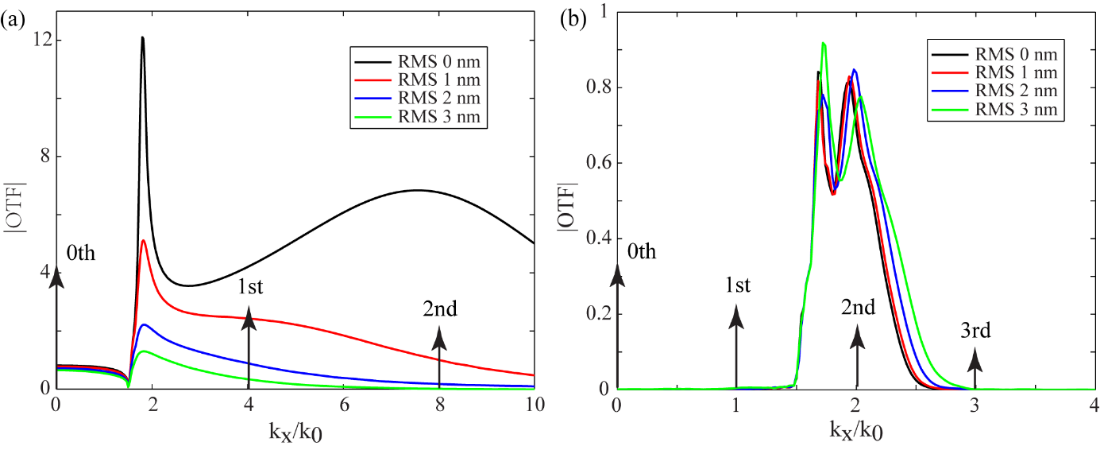


**Figure S5**. OTF curves of (a) a single Ag layer (20 nm) and (b) 9 layers Al (15 nm)/ SiO2 (30 nm) calculated with different RMS surface roughness. Arrows give the -space positions of diffraction orders of the masks in respective lithography systems.

As a complement of the main text, more simulations of the films with different RMS roughness are performed. The OTF of the Ag layer with thickness of 20 nm is given in Figure S5a, which presents it enables the evanescent waves of wide wave vector range to pass through the superlens. As the surface roughness increases, the transmission amplitude drops down quickly while still maintains a wide passband. The OTF of the HMMcomposed of Al (15 nm)/ SiO2 (30 nm) exhibits a narrow passband as shown in Figure S5b, where the waves with transverse wavevector ranged from 1.5 to 2.5 can pass through. For the designed HMM lithography system, only ±2nd order diffracted waves, corresponding to the wavevector about 2, can go through the multilayer. Though the bandwidth is a little bit broadened as the surface roughness increases, the amplitude of the OTF holds well. That narrow passbands still block the transmission of other diffracted waves. Therefore, the purified waves produce uniform patterns in the PR film.

S7 Calculation method about the line edge roughness

Line edge roughness (LER) plays a critical role in the lithography. To analyze the LER, the most commonly used parameter is the RMS deviation *σ* (3*σ* values are usually reported) [8-10]:

(S5)

where is the height of the point on the rough line along direction; is the average height of the rough line; is the total number of the points on the line. In this paper, we use the average RMS deviation (*σ*) of the sidewalls (half peak intensity positions of the periodic field distribution) to describe the LER of the patterns in the PR film.

S8 Comparison of the electric field components

To futher understand the impacts of the roughness in the real lithography systems, the distribution of the electric field components is analyzed in simulations with the reflective layers involved. To compare the results, we start from a simple analytic prediction. For a transverse magnetic (TM) wave, the electric field components in PR can be written as [11-12]:

(S6)

where is the component of the magnetic field; and are the and components of the electric field, respectively; and are the wavevectors with . If the feature size of the mask in the transverse direction is much smaller than the wavelength, , the wavevector along the direction can be simplified as a function of the parallel wavevector

(S7)

In this high- limit, the phase difference between and components is about *π*/2, which will cause a half-pitch shift between the distribution of and [13-14]. Generally the total electric field intensity of the pattern can be calculated by for a TM polarized wave. Due to the natural shift between the two electric components for the high- evanescent waves, if and have equal amplitude of transmission, blurred pattern will be formed in the PR film. Therefore, high ratio of is desired to form an image with good fidelity. The distribution and ratio of the field components can be used to evaluate the performance of the two systems.


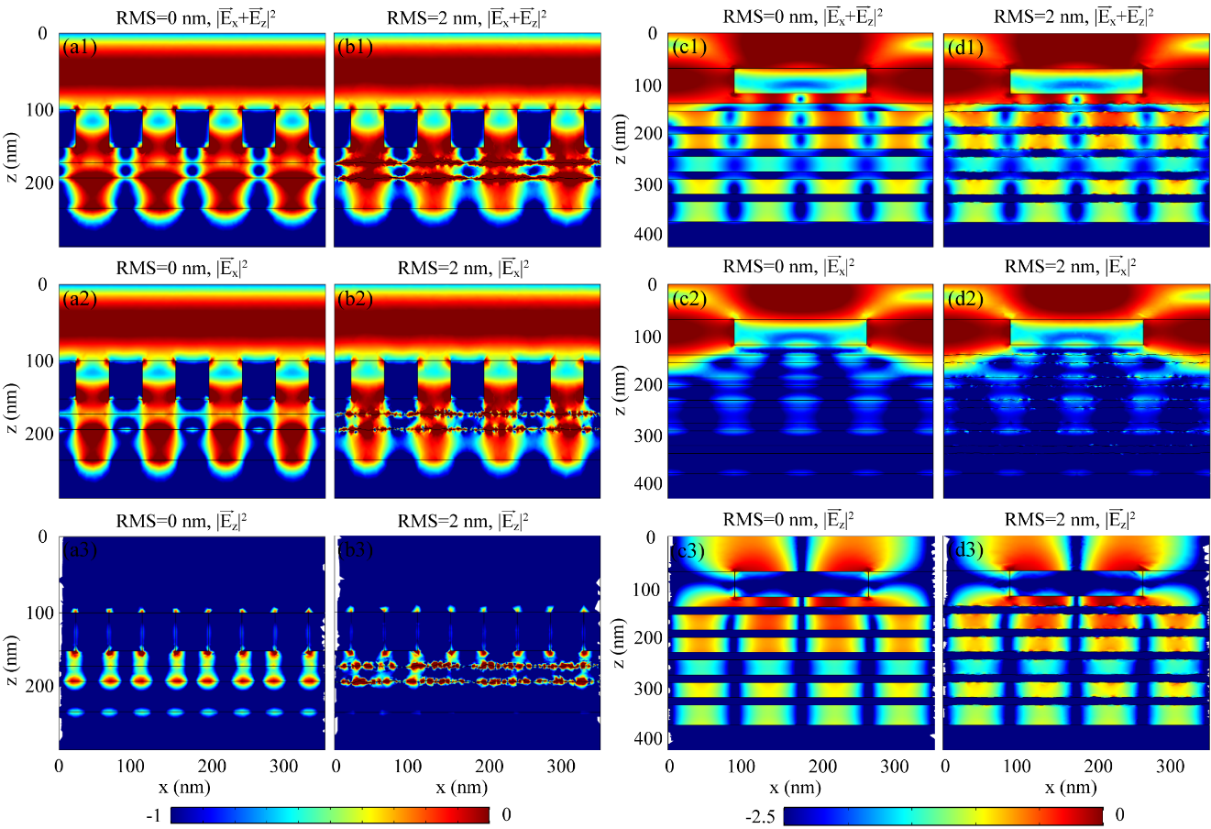


**Figure S6**. Normalized distributions of (top panel), (middle panel), and (bottom panel) in the lithography systems with (a) smooth superlens, (b) rough superlens, (c) smooth HMM, and (d) rough HMM. The logarithm scale is used in this figure.

The phase difference and the associated intensity shift can be confirmed by the simulation in both superlens and HMM lithography systems, as shown in Figure S6. The dominance and distribution of and components are different in the two systems. For the superlens system, the component dominates the imaging area; while the component is much weaker and is not located at the imaging position, as shown in Figure S6a1-a3. In addition, when the smooth Ag film is switched into a rough one with RMS roughness of 2 nm, both and components drop down drastically (Figure S6b2-b3). While, the ratio of for the 1st diffraction order (4) decreases from 11.1 to 9.9, meaning the quality of the pattern (*e.g.* intensity and fidelity) gets worse according to the foregoing analyses. However, for the HMM system, the component is dominant in the PR film; while the distribution of the component shift a half period compared with that of component , as shown in Figure S6c1-c3. Furthermore, both and components hold well as the roughness increases (Figure S6d2-d3). The ratio for the 2nd diffraction order (2) even increases a little from 76 to 80, maintaining its stable performance in the patterning process.

In addition, the contribution of and is also related to the different types of modes excited in superlens and HMM lithography systems. In the superlens lithography system, component is dominant (Figure 4c and Figure S6a-b), meaning the waves propagate vertically along the direction. Whereas, in the HMM lithography system, component is dominant (Figure 4d and Figure S6c-d), corresponding to the ±2nd order diffracted waves propagate laterally. This behavior makes it possible for the two high- waves to interfere with each other, resulting in periodic patterns in the beneath PR film.

S9 Effect of rough surface on SP excitation

In order to analyze the the excitation of the localized surface plasmon (LSP) by randomness on the rough surfaces, the excitation of the SP on the grating is introduced firstly. Due to the mismatch of wavevector, SP cannot be excited directly by the light illuminating on a smooth metal surface. However, the periodic grating can provide additional momentum to match the wavevector of the SP.

(S8)

where is the index of substrate; is the wave vector of light in free space; is the incident angle; *m* is the order of diffraction wave; is the period of the grating.

More generally, a rough surface can be considered as the superposition of many random gratings with different periodicities and orientations. For the distribution of randomness, the correlation function can be used to describe the spatial distance between the two points on the rough surface. Kretschmann defined a statistical correlation function for a rough surface [15-16]:

(S9)

where {\displaystyle z(x,y)}is the height above the mean height of the rough surface at position;{\displaystyle (x,y)} {\displaystyle A} is the area of integration. Assuming the statistical correlation function has a Gaussian form

(S10)

where {\displaystyle \delta } is the RMS height; *{\displaystyle r}* is the distance from the point {\displaystyle (x,y)}; and  is the correlation length. Then the Fourier transform of the correlation function is

(S11)

where the values of correspond to the different periods of the gratings at different directions in *k*-space. The value of is a measure of the amount of each spatial freqnuency {\displaystyle k_{\text{surf}}}. If the surface has only one Fourier component of roughness (*i.e.* the profile of the surface is sinusoidal),  *{\displaystyle s}* is discrete and exists only at {\displaystyle k={\frac {2\pi }{a}}}, resulting in a single direction for SP coupling. For a random surface, the  becomes continuous, meaning SP coupling is possible at multiple directions [17]. From the equations (S8) and (S11), we can conclude that the rough surface can lead to a series of excitations of the LSP.

S10 Spatial frequency selection


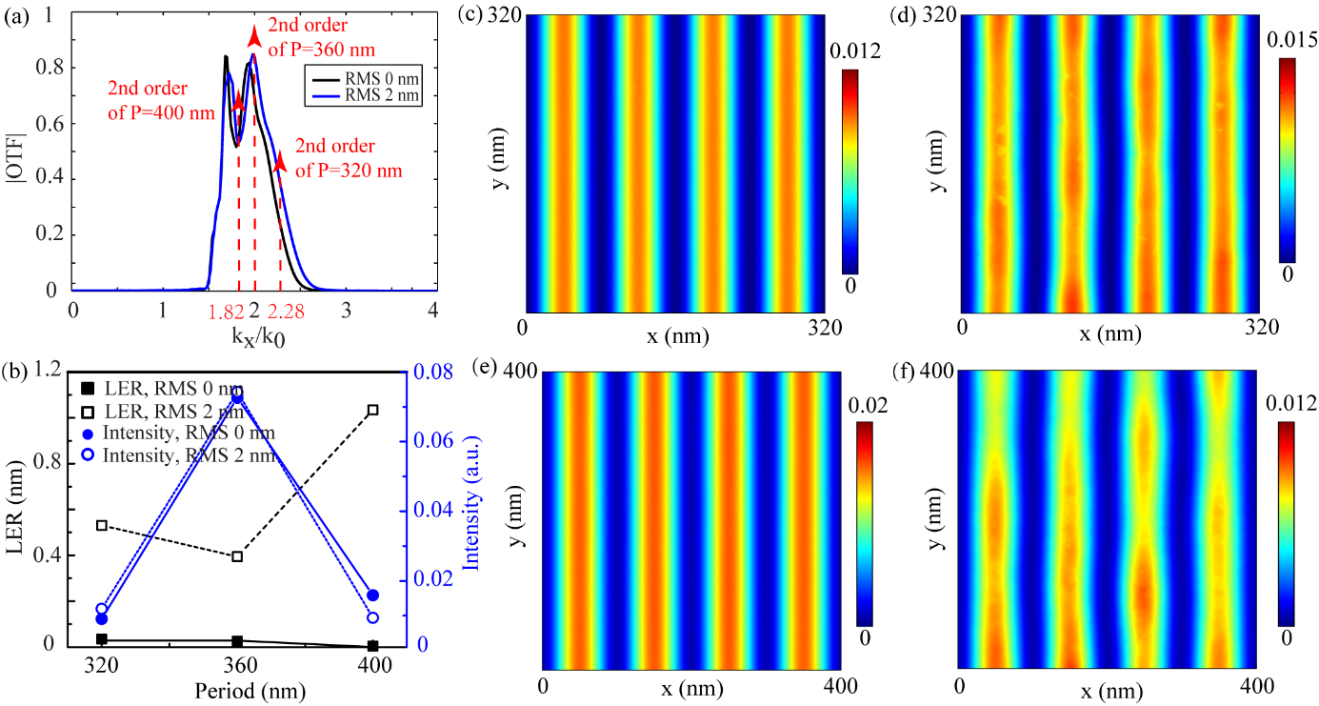


**Figure S7**. (a) OTF curve of the multilayer structure and spatial frequency spectrum of the 2nd diffraction order generated by the gratings with different periods. (b) LER and intensity of the pattern in PR film produced by grating mask with different periods. Squares denote the LER values, and dots denote the intensity values. Solid symbols indicate the systems with smooth films (RMS= 0 nm), and hollow symbols indicate the systems with rough films (RMS= 2 nm). (c, d) Normalized Intensity distributions of the pattern in the PR film produced from the mask with period of 320 nm. The multilayer is smooth (c) and rough (d), respectively. (e, f) Normalized Intensity distribution of the pattern in PR film produced from the mask with period of 400 nm. The multilayer is smooth (e) and rough (f), respectively.

To further demonstrate the principle of spatial frequency selection, we simulated the HMM-based lithography system with different periods of mask, as shown in Figure S7. The TM-polarized plane wave (the magnetic amplitude is set as 1 A/m) illuminates normally from the mask side. For the grating with period of 320 nm, the spatial frequency of the 2nd diffraction order is located at 2.28. When the smooth multilayer is replaced by a rough one with RMS = 2 nm, the LER of the pattern in PR film increases from 0 nm to 0.53 nm; while the average peak intensity increases from 0.009 to 0.012 (Figure S7b-d). For the grating with period of 400 nm, the spatial frequency of the 2nd diffraction order is located at 1.82. When the smooth multilayer is replaced by a rough one with RMS = 2 nm, the LER of the pattern increases from 0 nm to 1.03 nm; while the average peak intensity decreases from 0.016 to 0.01 (Figure S7b, e-f). The quality of the pattern generated from the grating with period of 360 nm shown in the main text is better than that in the forementioned two situations. It is because its spatial frequency of the 2nd diffraction order locates at the middle of the passband (2), which concides with the peak of OTF.

In other words, all the diffracted waves located in the range of 1.5~2.5 produce interference pattern after passing through the multilayer, but without optimizing the the mask (*e.g.* period), one may not get the benefits of spatial frequency selection, especially with roughness involved.

S11 Plasmonic lithography with a single slit on the mask


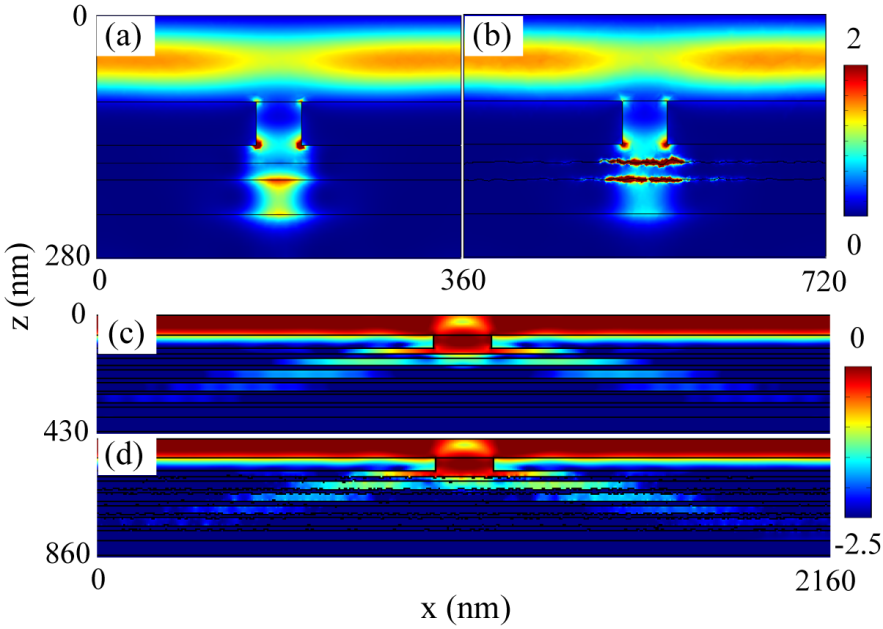


**Figure S8** Normalized intensity distribution through a single slit on the mask in both (a, b) superlens system and (c, d) HMM system. Surface roughness of the films is 0 nm (a, c) and 2 nm (b, d), respectively. The logarithm scale is used in (c, d).

To study the mode propagation property of the superlens and the HMM, the light scattering by a single slit on the mask is simulated. The cases of smooth and rough surfaces in both superlens and HMM lithography systems are shown in Figure S8. For the superlens system, the smooth Ag film works as a plasmonic lens, which enhances and transmits the evanescent waves in a wide wave vector range by coupling the SP from one side to the other. However, this performance is disturbed severely by the rough surface, which excites LSP at the concave and convex positions [18]. The excitation of LSP leads to the energy accumulated on the rough surface, which can be scattered into multiple directions. Thus, the pattern in PR film has poor profile and weak intensity (Figure S8b). For the HMM system, due to the hyperbolic dispersion character of the stacked multilayer, the diffracted waves propagate laterally, as shown in Figure S8c. Assuming a TM-polarized plane wave propagating in plane, there is a dispersion equation:

(S12)

where  and are the effective permittivities of the HMM in parallel and normal direction, respectively; and are the corresponding wavevectors [19-21]. When , the spreading angle can be estimated by the resonant cone, which is evaluated by .According to the effective medium theory [22],

, (S13)

where is the fill ratio of metal in multilayer; and are the permittivities of metal and dielectric, respectively. Because the average thickness of rough films are set to be equal to that of smooth films in simulation (Figure S9), is stable, meaning that the propagating SP (PSP) mode is not destroyed by the rough multilayer (Figure S8d). The stacked multilayer keeps its performance of hyperbolic dispersion, and the divergence angle caused by the resonant cone maintains (Figure S8c-d).

**
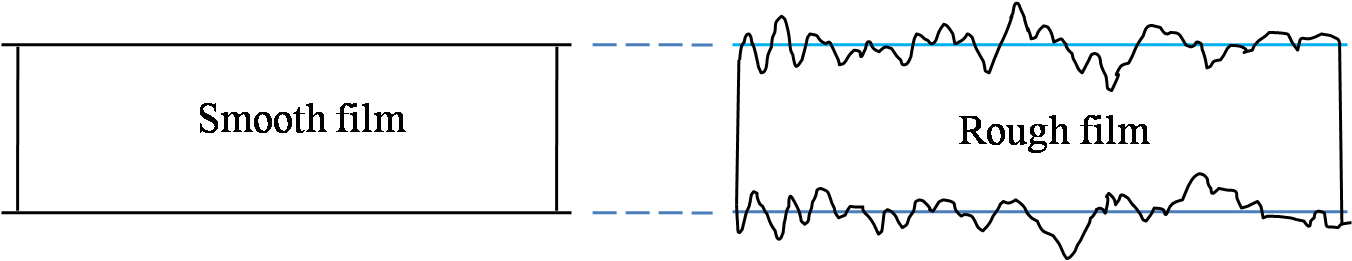
**

**Figure S9**. Schematic of smooth and rough films with same average thickness.

S12 Effect of rough mask on plasmonic lithography


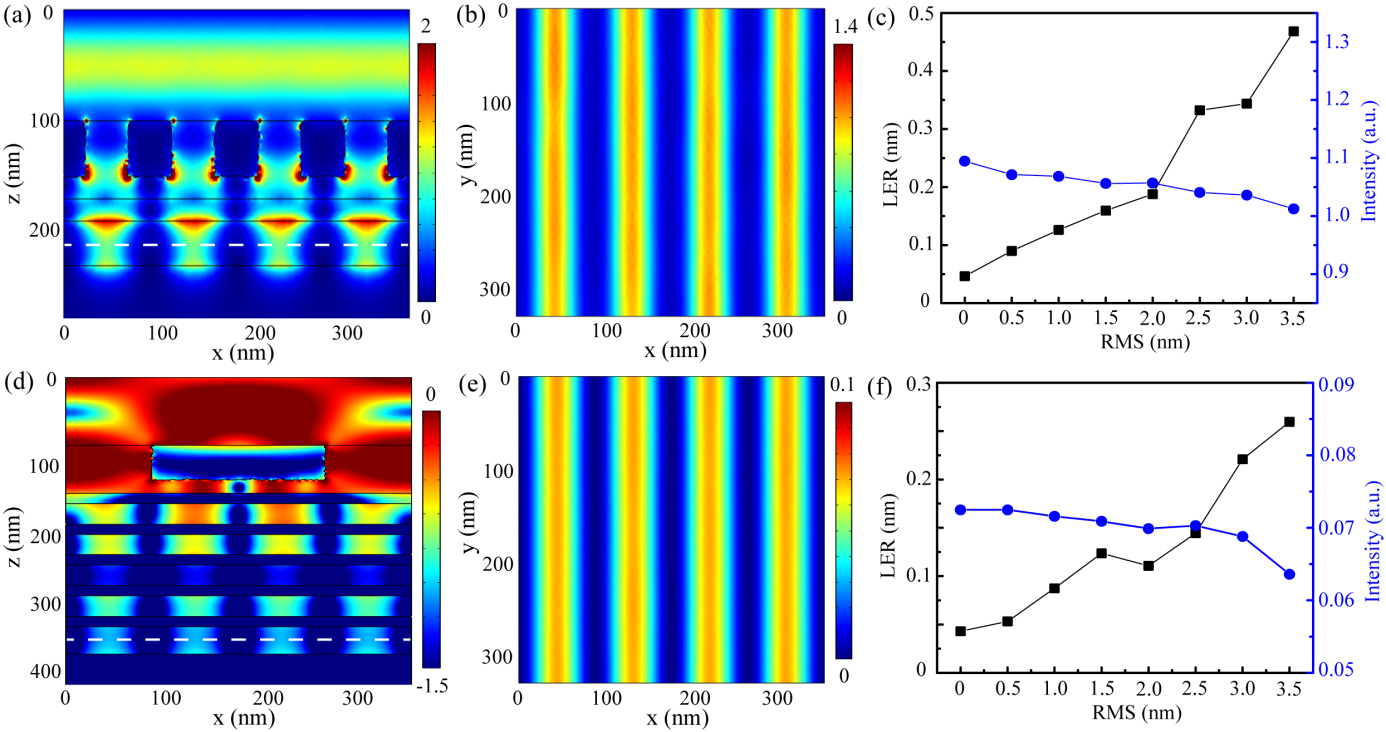


**Figure S10**. Side view (a) and top view (b) of the normalized electric field intensity distribution in superlens system with RMS =2 nm on the mask surface. (c) LER and intensity variation of the pattern in PR film as the RMS increases. (d, e, f) Corresponding simulation results in the HMM system with rough surface of mask. The logarithm scale is used in (d). The dashed lines give the positions of collection planes in the patterns.

The grating masks with rough surfaces are simulated in both superlens and HMM lithography systems, which are shown in Figure S10. When the TM polarized light illuminates on the grating with RMS roughness of 2 nm, the sub-diffraction limited features can be reconstructed in the PR film for both systems. Besides, as the RMS roughness increases form 0 nm to 3.5 nm, the LER increases gradually in both systems. Due to the LSP excited on the rough surface of mask, non-uniform intensity distribution is delivered to the PR film. Meanwhile, the intensity of the patterns decreases slightly, which is because the light scattering at the rough grating cuts down the transmission. However, with the same RMS roughness, the quality of the pattern formed in superlens system is impacted more severely than that in HMM system. Additionally, comparing the simulation of rough surface on films and gratings, it is observed that the pattern in the PR film is more sensitive to rough films than to rough gratings.

S13 Different functions of metal films at different wavelengths


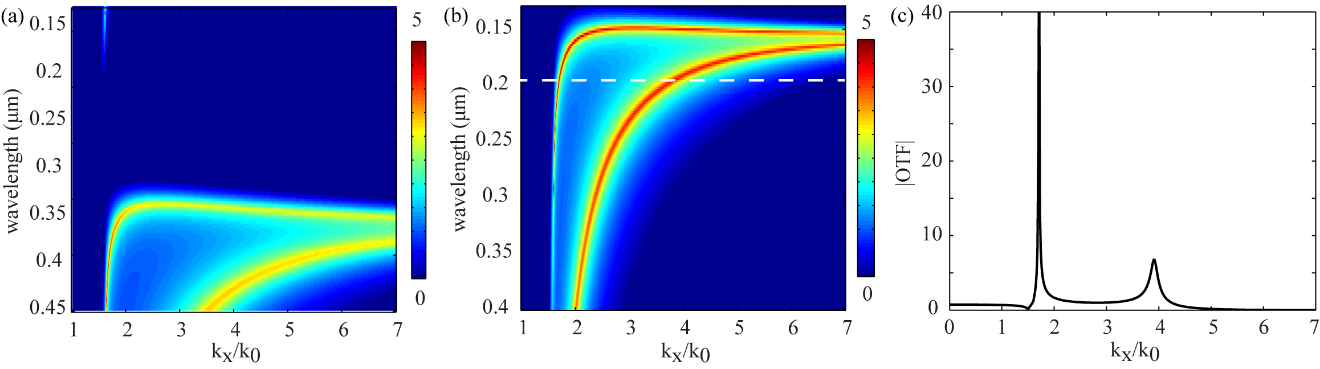


**Figure S11**. (a, b) Dispersions of Ag film (20 nm-thick) and Al film (12 nm-thick), respectively. (c) OTF of Al film (12 nm-thick) at wavelength 193 nm (the dashed line positon in (b)).

Basically, superlens is designed to provide broad transmission passband but HMM acts as a filter which has much narrower passband. However, same metal can function diversely in different schemes or wavelengths. Figure S11a-b shows the dispersions of Ag (20 nm-thick) film and Al (12 nm-thick) film, respectively. Here, the permitivities of Ag and Al are calculated based on the Drude model [23-24]. For the Ag film, the dispersion shows a broad passband near the wavelength of 365 nm. Therefore, it is advantigous to be used as a superlens in imaging. However, the Al film has a narrow passband at the wavelength of 365 nm, which is helpful to transmit a single -vector mode. In addition, Al film is possible to be used as a superlens at short wavelength. Figure S11c shows the OTF of Al film at the working wavelength of 193 nm. It presents a broad passband range of 0~5 . In this case, a grating mask with period of 90 nm can be reconstructed very well in the PR film, which is shown in below Figure S12.


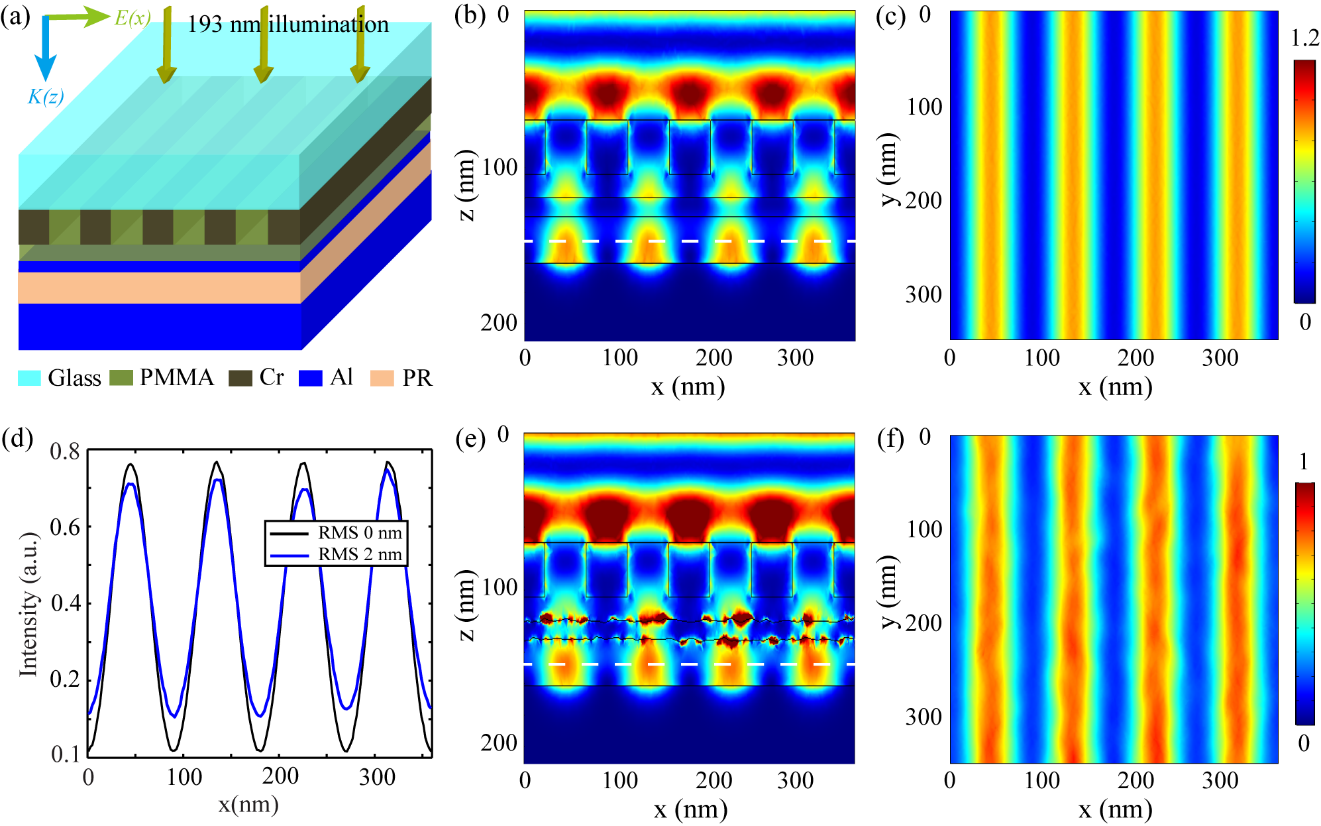


**Figure S12**. (a) Schematics of plasmonic lithography with an Al film-based superlens. The working wavelength of the system is 193 nm. (b) Side view and (c) top view of the normalized intensity distributions with smooth Al film (RMS=0 nm); (e, f) Corresponding simulation results with rough Al film (RMS=2 nm); (d) Normalized intensity distributions extracted from the dashed line positions in (b, e).

The structure in Figure S12a is almost identical to the Ag film-based superlens system, but the thin metal film is an Al-based film with thickness of 12 nm. In the case of smooth film, the normalized intensity distribution imaged from the 90 nm-period grating mask are shown in Figure S12b. The cross-section, taken from the middle position of PR film, shows a uniform pattern with straight profiles and high intensity contrast (Figure S12c). However, when the roughness of RMS = 2 nm is introduced to the both surfaces of the Al film, the field distributions are severely distorted (Figure S12e-f). The pattern produced in the PR film presents sinuous profiles and large LER. Meanwhile, the intensity of the patterns is reduced dramatically (Figure S12d). These behaviors are same to that of the Ag film-based superlens system analyzed in main text. Overall, since the broad passband of evanescent waves, the effects of roughness cannot be suppressed, which result in poor profiles on the patterns.

References

[1] Cortes C. L., Newman W., Molesky S., and Jacob Z., Quantum nanophotonics using hyperbolic metamaterials. J. Opt. 2012, 14, 063001.

[2] Drachev V. P., Podolskiy V. A., and Kildishev A. V., Hyperbolic metamaterials: new physics behind a classical problem. Opt. express 2013, 21, 15048-15064.

[3] Ferrari L., Wu C., Lepage D., Zhang X., and Liu Z., Hyperbolic metamaterials and their applications. Prog. Quant. Electron. 2015, 40, 1-40.

[4] Kou Y., and Chen X., Multimode interference demultiplexers and splitters in metal-insulator-metal waveguides. Opt. Express 2011, 19, 6042-6047.

[5] Poddubny A., Iorsh I., Belov P., and Kivshar Y., Hyperbolic metamaterials. nat. photonics 2013, 7, 948-957.

[6] Moharam M. G., and Gaylord T. K., Rigorous coupled-wave analysis of planar-grating diffraction. J. Opt. Soc. Am. 1981, 71, 811.

[7] Liang G. F., Wang C. T., Zhao Z. Y., et al., Squeezing bulk plasmon polaritons through hyperbolic metamaterials for large area deep subwavelength interference lithography. Adv. Opt. Mater. 2015, 3, 1248-1256.

[8] Constantoudis V., Gogolides E., Patsis G. P., Tserepi A., and Valamonteset E. S., Characterization and simulation of surface and line-edge roughness in photoresists. J. Vac. Sci. Technol. B 2001, 19, 2694-2698.

[9] Patsis G. P., Constantoudis V., Tserepi A., Gogolides E., and Grozev G., Quantification of line-edge roughness of photoresists. I. A comparison between off-line and on-line analysis of top-down scanning electron microscopy images. J. Vac. Sci. Technol. B 2003, 21, 1008-1018.

[10] Li N., Zhao X., Wang W., and Li H., Spatial analysis of line-edge roughness through scaling and fractal concepts using AFM techniques. Proc. of SPIE 2006, 6152, 615246.

[11] Maier S. A., Plasmonics: fundamentals and applications. 2006, Springer, Berlin.

[12] Zhang W., Yao N., Wang C. T., et al. Off axis illumination planar hyperlens for non-contacted deep subwavelength demagnifying lithography. Plasmonics, 2014, 9,1333-1339.

[13] Zhao Z. Y., Luo Y. F., Zhang W., et al, Going far beyond the near-field diffraction limit via plasmonic cavity lens with high spatial frequency spectrum off-axis illumination. Sci. Rep. 2015, 5, 15320.

[14] Huang Q. Z., Wang C. T., Yao N., et al. Improving imaging contrast of non-contacted plasmonic lens by off-axis illumination with high numerical aperture. Plasmonics, 2014, 9, 699-706.

[15] Kretschmann E., The angular dependence and the polarisation of light emitted by surface plasmons on metals due to roughness. Opt. Commun. 1972, 5, 331-336.

[16] Kretschmann E., Die bestimmung der oberflächenrauhigkeit dünner schichten durch messung der winkelabhängigkeit der streustrahlung von oberflächenplasmaschwingungen. Opt. Commun. 1974, 10, 353-356.

[17] Wikidata contributors, surface plasmon polariton. (Accessed: November 20, 2016, at https://en.wikipedia.org/wiki/Surface_plasmon_polariton.)

[18] Raether H., Surface plasmons on smooth and rough surfaces and on gratings. 1988, Springer-Verlag, Berlin.

[19] Yang X. D., Yao J., Rho J., Yin X. B., and Zhang X., Experimental realization of three-dimensional indefinite cavities at the nanoscale with anomalous scaling laws, Nat. Photonics 2012, 6, 450-454.

[20] Ishii S., Kildishev A. V., Narimanov E., Shalaev V. M., and Drachev V. P., Sub-wavelength interference pattern from volume plasmon polaritons in a hyperbolic medium. Laser Photonics Rev. 2013, 7, 265-271.

[21] Wang C. T., Zhao Y. H., Gan D. C., Du C. L., and Luo X. G., Subwavelength imaging with anisotropic structure comprising alternately layered metal and dielectric films. Opt. Express 2008, 16, 4217-4227.

[22] Tretyakov S., Analytical modeling in applied electromagnetics. 2003, Artech House, Norwood.

[23] Drude P., Zur Elektronentheorie der Metalle, Ann. Phys. 1900, 1, 566-613.

[24] Sirdeshmukh D. B., Sirdeshmukh L., Subhadra K. G., and Sunandana C. S., Theory of free electrons I: classical theory. 2014, 207, 33-48.

1. G. F. Liang: Department of Electrical Engineering and Computer Science, University of Michigan, Ann Arbor, Michigan 48109, USA,

   and School of Physical Electronics, University of Electronic Science and Technology of China, Chengdu, 610054, China

   X. Chen: Department of Electrical Engineering and Computer Science, and Applied Physics, University of Michigan, Ann Arbor, Michigan 48109, USA

   Q. Zhao: School of Physical Electronics, University of Electronic Science and Technology of China, Chengdu, 610054, China

   **Corresponding author:** L. J. Guo: Department of Electrical Engineering and Computer Science, and Applied Physics, University of Michigan, Ann Arbor, Michigan 48109, USA, E-mail: [guo@umich.edu](mailto:guo@umich.edu); and Q. Zhao: School of Physical Electronics, University of Electronic Science and Technology of China, Chengdu, 610054, China, Email: zhaoq@uestc.edu.cn [↑](#footnote-ref-1)
